# Supplementary material for: Asymmetric parental genome engineering by Cas9 during mouse meiotic exit
Source: PubMed Central journal article supplement — Sci Rep. 2014 Dec 23;4:7621. doi: 10.1038/srep07621 (PMC4274505; doi:10.1038/srep07621), 2014-12-23
Supplement: srep07621-s1.pdf [file srep07621-s1.pdf]

# **Asymmetric parental genome engineering by Cas9 during mouse meiotic exit**

Toru Suzuki<sup>1\*</sup>, Maki Asami<sup>1\*</sup>, and Anthony C. F. Perry<sup>1</sup>

<sup>1</sup>Laboratory of Mammalian Molecular Embryology, Department of Biology and Biochemistry, University of Bath, BA2 7AY, England.

Correspondence and requests for materials should be addressed to A.C.F.P. (perry135@aol.com)

\*These authors contributed equally to this work.

## Supplementary Figure legends

### Supplementary Figure 1 | Disruption of green fluorescence in blastocysts following mII editing.

(A) Paired Hoffman modulation (upper) and eGFP expression (eGFP) images of E4.0 blastocysts produced by 1-step injection of wild-type (wt) mII oocytes with Nanog-eGFP sperm from hemizygotes with concentrations of injected *Cas9* cRNA and *eGFP* gRNA indicated beneath. (B) Paired Hoffman modulation (upper) and eGFP expression (eGFP) images as per (A), except that oocytes were used from *Nanog-eGFP* knock-in hemizygotes, with wt sperm. Red highlights accompanying histograms provide an at-a-glance indication of RNA concentrations. Bars, 100  $\mu$ m.

### Supplementary Figure 2 | Pedigree analysis of offspring produced after mII editing.

(A) Pedigree analyses of founder lines produced by the 1-step method of mII editing (Fig. 1A). Inset tables indicate injected concentrations (ng/ $\mu$ l) of *Cas9* cRNA (c) and gRNA (g) against tyrosinase (*Tyr*) and *Foxn1*, the number of 2-cell embryos transferred and term offspring, indicating perinatal mortality and survivors (number and percentage) possessing a mutant phenotype. Symbols are: box, male; circle, female; black coat, filled; white coat, open; mosaic (white and black coat), half-filled; red, genomic sequencing revealed one or more mutations; br, two F1 females with brown coats; wt, wild-type *Tyr* sequence; i, eye phenotype; CD1, the outbred strain, CD1 (ICR). (B) Pedigree analysis of founder lines as per (A), except that offspring were produced by the sequential method of mII editing (Fig. 1A).

### Supplementary Figure 3 | Genome sequence analysis of offspring produced by native gene mII editing.

(A) Genomic sequences of offspring produced by the 1-step method of mII editing at the tyrosinase (*Tyr*) locus by injecting 30 ng/ml *Cas9* cRNA and *Tyr* gRNA. The gRNA-corresponding sequence (green) plus adjacent 5' sequence is displayed on the top row and mutants beneath, with the proto-spacer adjacent motif (PAM) highlighted in green. Mutations are indicated in red type-face. 5' +, mutations detected 5' (but not 3') of the displayed sequence; 3' +, mutations detected 3' of the displayed sequence. Yellow highlighting indicates ambiguous calls presumptively produced by multiple targeting events. The inset table indicates the corresponding phenotypic change (if any) exhibited by offspring. (B) Founder (F0, top) and F1 offspring produced by Cas9-mediated mII editing of the *Tyr* locus by injecting 30 ng/ml *Cas9* cRNA and *Tyr* gRNA as indicated. Editing to produce founders was performed in C57BL/6. White arrowheads, mosaic; red arrowheads, apparently non-mosaic mutants. The F1 litter was produced by crossing a black coat-colour female founder (indicated) with a CD1 male; the founder carried a germline *Tyr* mutation confirmed by sequencing, to produce white coat-colour pups (indicated). Non-white coat colour mutations associated with *Tyr* are

presumptively responsible for the brown coat colour F1 phenotype<sup>37</sup>.

## Supplementary reference

37. Lavado, A., Olivares, C., García-Borrón, J.C. & Montoliu, L. (2005). Molecular basis of the extreme dilution mottled mouse mutation: a combination of coding and noncoding genomic alterations. *J. Biol. Chem.* **280**, 4817-4824.

**Supplementary Table S1. Primers used in this work**

| primer           | target      | sequence (5'→3')       |
|------------------|-------------|------------------------|
| GFP-Venus-S      | <i>eGFP</i> | GACGTAAACGGCCACAAGTT   |
| GFP-Venus-AS2    | <i>eGFP</i> | GTCCTCCTTGAAGTCGATGC   |
| Tyr 55F          | <i>Tyr</i>  | GGAGAAAATGTTCTTGGCTG   |
| Tyr 651R         | <i>Tyr</i>  | TCCCTCCATATTTTCAGAGCCC |
| $\beta$ -actin-F | <i>Actb</i> | CCACCACAGCTGAGAGGGAA   |
| $\beta$ -actin-R | <i>Actb</i> | AGCCACCGATCCACACAGAG   |

**A**

Nanog-eGFP sperm  
1-step

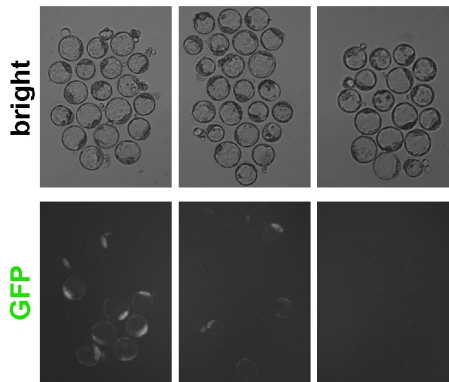

|      |   |    |     |
|------|---|----|-----|
| Cas9 | 0 | 10 | 100 |
| gRNA | 0 | 10 | 200 |

**B**

Nanog-eGFP oocyte  
1-step

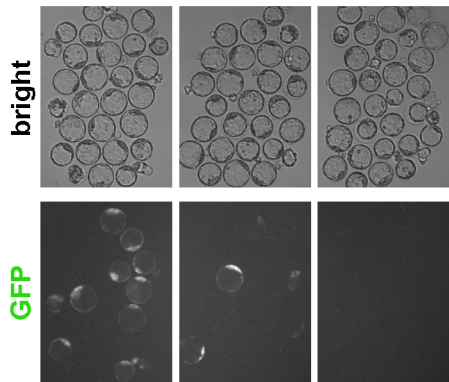

|  |   |    |     |             |
|--|---|----|-----|-------------|
|  | 0 | 10 | 100 | ng/ $\mu$ l |
|  | 0 | 10 | 200 | ng/ $\mu$ l |

Supplementary Figure S1

A

|                   |              |
|-------------------|--------------|
| <i>Tyr</i>        | c30g30       |
| birth/emb tf      | 60/106       |
| perinatal death   | 3            |
| phenotypic change | 9/57 (15.8%) |

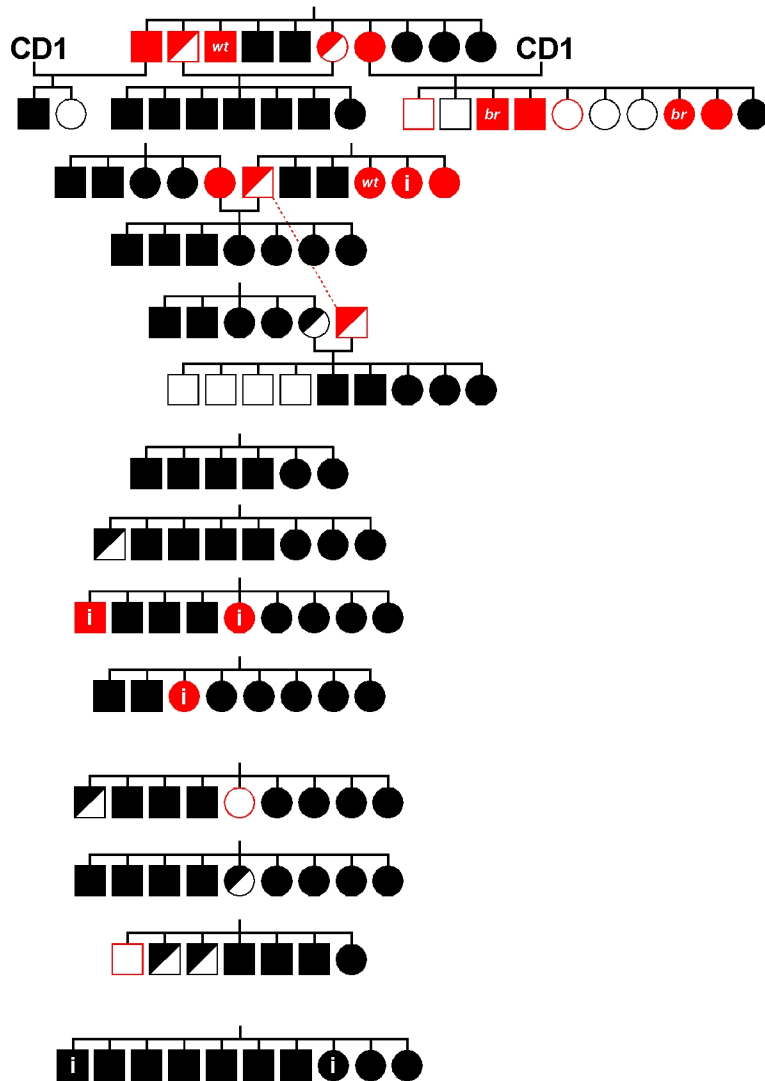

|                   |              |
|-------------------|--------------|
| <i>Tyr</i>        | c100g200     |
| birth/emb tf      | 28/48        |
| perinatal death   | 3            |
| phenotypic change | 6/25 (24.0%) |

|                    |              |
|--------------------|--------------|
| <i>Tyr + Foxn1</i> | c30g30       |
| birth/emb tf       | 11/60        |
| perinatal death    | 1            |
| phenotypic change  | 2/10 (20.0%) |

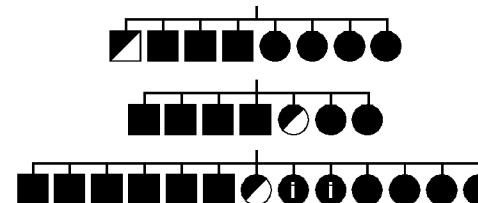

|                    |              |
|--------------------|--------------|
| <i>Tyr + Foxn1</i> | c100g200     |
| birth/emb tf       | 31/48        |
| perinatal death    | 3            |
| phenotypic change  | 5/28 (17.9%) |

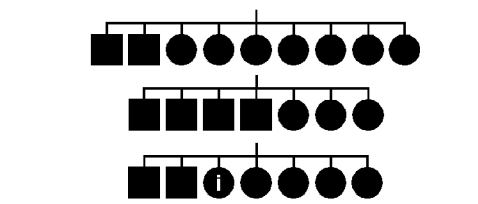

|                   |             |
|-------------------|-------------|
| <i>Foxn1</i>      | c30g30      |
| birth/emb tf      | 59/108      |
| perinatal death   | 4           |
| phenotypic change | 1/55 (1.8%) |

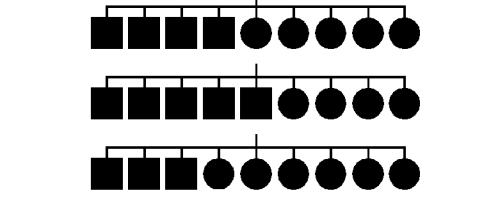

B

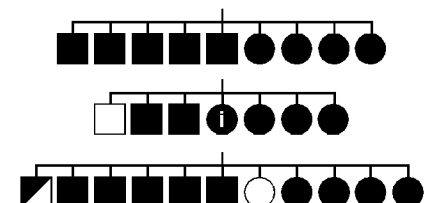

|                    |              |
|--------------------|--------------|
| <i>Tyr + Foxn1</i> | c30g30       |
| birth/emb tf       | 30/60        |
| perinatal death    | 3            |
| phenotypic change  | 4/27 (14.8%) |

**A****1-step  
Tyr**

AAGAACTTGTGGCAAAGAATGCTGCCACCATGGATGGGTGATGGGAGTCCCTGCGGCCAGCTTTCAGG  
 MWKRWTGGCAA<sup>R</sup>CAAARSARYSCWCCCCRS<sup>C</sup>WKGGWKRK<sup>G</sup>GA<sup>K</sup>KKSSMKK<sup>C</sup>SSYSM<sup>G</sup>SMSAGS<sup>[.]</sup>TTCAGG c100g200  
 ARRAMYT<sup>K</sup>KT<sup>K</sup>GSMAAARRAWKSYKSC<sup>M</sup>MMCMWK<sup>G</sup>RWKGG<sup>K</sup>KRWKGG<sup>R</sup>RRKYCC<sup>Y</sup>KSSG<sup>S</sup>CMRSYTTCAGG c100g200  
 AAGAACYCRT<sup>K</sup>GRYARAAGAWK<sup>G</sup>SWGCCCM<sup>C</sup>CAK<sup>G</sup>SM<sup>[.]</sup>.....JW<sup>G</sup>SK<sup>T</sup>KMWGG c30g30  
 WAGCM<sup>C</sup>YGGTTGGCAAAMTAATGYWAGM<sup>C</sup>MYCATGGGC<sup>G</sup>GGGAGA<sup>R</sup>GG<sup>S</sup>W<sup>G</sup>CCC<sup>M</sup>CAK<sup>G</sup>SG<sup>S</sup>W<sup>G</sup>SK<sup>T</sup>KMWGG c30g30  
 5' + AAGAACTTGTGGCAAAGAATGCTGCCACCA<sup>K</sup>GGATGGGTGATGGGAGTCC<sup>S</sup>TGCG<sup>R</sup>CCAG<sup>M</sup>TTTCAGG c30g30  
 5' + RARAATG<sup>T</sup>TT<sup>K</sup>KS<sup>M</sup>WRWKA<sup>W</sup>GKAT<sup>K</sup>SC<sup>T</sup>Y<sup>C</sup>W<sup>G</sup>Y<sup>G</sup>RA<sup>G</sup>Y<sup>W</sup>MSA<sup>R</sup>W<sup>M</sup>T<sup>K</sup>YS<sup>R</sup>K<sup>G</sup>SS<sup>C</sup>MY<sup>W</sup>K<sup>Y</sup>YSTCAGG c30g30  
 5' + ARRAMYT<sup>K</sup>KT<sup>K</sup>GSMAAARRAWKSYKSC<sup>M</sup>MMCMWK<sup>G</sup>RWKGG<sup>K</sup>KRWKGG<sup>R</sup>RRKYCC<sup>Y</sup>KSSG<sup>S</sup>CMRSYTTCAGG c30g30  
 5' + AAGAACTTGTGGCAAAGAATGCTGCCACCATGGATGGGTGATGGGAGTCCCTGCGGCCAGCTTTCAGG c30g30  
 5' + YYGAATT<sup>M</sup>G<sup>T</sup>RG<sup>G</sup>CA<sup>R</sup>GCY<sup>K</sup>GTSA<sup>T</sup>Y<sup>G</sup>TCA<sup>T</sup>CA<sup>M</sup><sup>T</sup>RAW<sup>M</sup>GG<sup>T</sup>CATGGGAGTCCCTGCGGCCAGCTTTCAGG c30g30  
 5' + AAG<sup>R</sup>RC<sup>A</sup>WR<sup>W</sup>KAR<sup>C</sup>AAAA<sup>S</sup>AC<sup>W</sup>SC<sup>W</sup>KSS<sup>C</sup>WSC<sup>[.]</sup>.....J<sup>R</sup>TG<sup>R</sup>W<sup>K</sup>GG<sup>R</sup>K<sup>K</sup>MY<sup>S</sup>K<sup>G</sup>M<sup>G</sup>K<sup>C</sup>C<sup>M</sup>K<sup>S</sup>Y<sup>K</sup>K<sup>C</sup>AGG c30g30  
 5' + AAGAACTTGTGGCAAAGAATGCTGCCACCATGGATGGGTGATGGGAGTCCCTGCGGCCAGCTTTCAGG c30g30  
 5' + WARRAMY<sup>T</sup>KT<sup>K</sup>GSMAAARRAWKSYKSC<sup>M</sup>MMCMWK<sup>G</sup>RWKGG<sup>K</sup>KRWKGG<sup>R</sup>RRKYCC<sup>Y</sup>KSSG<sup>S</sup>CMRSYTTCAGG c30g30

**B**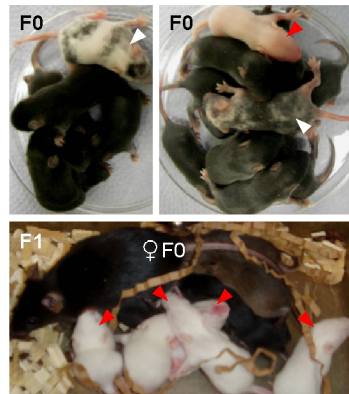

| phenotype change    |
|---------------------|
| white               |
| white (F1)          |
| eye                 |
| eye                 |
| none                |
| mosaic, black>white |
| none                |
| none                |
| none                |
| mosaic              |
| mosaic, white>black |
| mosaic, white>black |
| none                |

**Supplementary Figure S3**
